# Supplementary material for: XGBoost: An Optimal Machine Learning Model with Just Structural Features to Discover MOF Adsorbents of Xe/Kr
Source: PubMed Central journal article supplement — ACS Omega. 2021 Mar 19;6(13):9066–76. doi: 10.1021/acsomega.1c00100 (PMC8028164; doi:10.1021/acsomega.1c00100), 2021-03-19
Supplement: ao1c00100_si_001.pdf [file ao1c00100_si_001.pdf]

**XGBoost: An Optimal Machine Learning Model with just Structural  
Features to Discover MOF Adsorbents of Xe/Kr**

**Supporting Information**

Heng Liang<sup>1</sup>, Kun Jiang<sup>2</sup>, Tong-an Yan<sup>3</sup> and Guang-hui Chen<sup>1\*</sup>

1 Department of Chemistry, Key Laboratory for Preparation and Application of Ordered Structural Materials of Guangdong Province, Shantou University, Shantou 515063, Guangdong Province, China

2 Department of Natural Science, Shantou Polytechnic, Shantou 515041, Guangdong Province, China

3 State Key Laboratory of Organic-Inorganic Composites, Beijing University of Chemical Technology, Beijing 100029, China

E-mail: [ghchen@stu.edu.cn](mailto:ghchen@stu.edu.cn)

## Table of Contents

|                 |      |
|-----------------|------|
| Table S1.....   | S-3  |
| Table S2.....   | S-4  |
| Table S3.....   | S-5  |
| Table S4.....   | S-6  |
| Figure S1 ..... | S-7  |
| Figure S2 ..... | S-11 |
| Figure S3 ..... | S-12 |
| Figure S4 ..... | S-21 |
| Figure S5 ..... | S-22 |

**Table S1. The optimum regression model of Xe/Kr adsorption separation on MOFs in testing set at 1 bar and 298 K, where MSE, MAE, RMSE and R<sup>2</sup> represents mean square error, mean absolute error and determination coefficient, respectively. For adsorption capacity, the unit of MSE, MAE and RMSE is mmol<sup>2</sup>/g<sup>2</sup>, mmol/g and mmol/g, respectively.**

| property             | model       | MSE   | MAE   | RMSE  | R <sup>2</sup> |
|----------------------|-------------|-------|-------|-------|----------------|
| N <sub>(Xe)</sub>    | Ridge       | 0.035 | 0.101 | 0.187 | 0.393          |
|                      | LASSO       | 0.035 | 0.102 | 0.187 | 0.393          |
|                      | Elastic net | 0.035 | 0.102 | 0.187 | 0.392          |
|                      | SVM         | 0.038 | 0.130 | 0.195 | 0.334          |
|                      | Bayesian    | 0.035 | 0.101 | 0.187 | 0.392          |
|                      | ANN         | 0.026 | 0.095 | 0.161 | 0.560          |
|                      | RF          | 0.006 | 0.044 | 0.077 | 0.883          |
|                      | XGBoost     | 0.003 | 0.029 | 0.055 | 0.951          |
| S <sub>(Xe/Kr)</sub> | Ridge       | 0.761 | 0.506 | 0.872 | 0.688          |
|                      | LASSO       | 0.762 | 0.506 | 0.873 | 0.686          |
|                      | Elastic net | 0.762 | 0.507 | 0.873 | 0.687          |
|                      | SVM         | 0.827 | 0.432 | 0.909 | 0.660          |
|                      | Bayesian    | 0.760 | 0.505 | 0.872 | 0.687          |
|                      | ANN         | 0.411 | 0.352 | 0.641 | 0.831          |
|                      | RF          | 0.164 | 0.229 | 0.405 | 0.933          |
|                      | XGBoost     | 0.065 | 0.147 | 0.255 | 0.973          |

**Table S2. Cluster analysis of three categories of MOFs in Class A, B and C. Note that the  $N_{Xe}$  (mmol/g) and  $S_{Xe/Kr}$  are average values.**

|          | <b>MSE</b> | <b>NOS</b> | <b><math>N_{Xe}</math></b> | <b>MSE</b> | <b>NOS</b> | <b><math>S_{Xe/Kr}</math></b> |
|----------|------------|------------|----------------------------|------------|------------|-------------------------------|
| <b>A</b> | 0.459      | 476        | 2.016                      | 8.35       | 1542       | 9.696                         |
| <b>B</b> | 0.104      | 376        | 2.492                      | 30.76      | 10         | 17.892                        |
| <b>C</b> | 0.298      | 586        | 1.2                        | 1.763      | 15281      | 6.094                         |

NOS: Number of Samples

**Table S3. The statistics analysis of CO<sub>2</sub>/CH<sub>4</sub> selectivity ( $s_{CO_2/CH_4}$ ) and adsorption uptake ( $N_{CO_2}$ ) (mmol/g) of MOFs in G-MOFs database at 298 K and 1 bar.**

| property      | $s_{CO_2/CH_4}$ | $N_{CO_2}$ |
|---------------|-----------------|------------|
| data analysis |                 |            |
| Std           | 2.5871          | 1.1336     |
| 50%           | 3.4023          | 1.0499     |
| 75%           | 4.7658          | 1.8968     |
| Max           | 85.3023         | 11.9110    |

**Table S4. The optimum regression models of CO<sub>2</sub>/CH<sub>4</sub> adsorption separation on MOFs in testing set at 1 bar and 298 K, where R<sup>2</sup> represents determination coefficient.**

| property    | R <sup>2</sup> ( <i>sc</i> CO <sub>2</sub> /CH <sub>4</sub> ) | R <sup>2</sup> ( <i>N</i> CO <sub>2</sub> ) |
|-------------|---------------------------------------------------------------|---------------------------------------------|
| ML model    |                                                               |                                             |
| Ridge       | 0.2246                                                        | 0.4007                                      |
| LASSO       | 0.2247                                                        | 0.4000                                      |
| Elastic net | 0.2245                                                        | 0.4001                                      |
| SVM         | 0.2126                                                        | 0.4864                                      |
| Bayesian    | 0.2245                                                        | 0.4006                                      |
| ANN         | 0.3382                                                        | 0.6413                                      |
| RF          | 0.6461                                                        | 0.8391                                      |
| XGBoost     | 0.6836                                                        | 0.8817                                      |

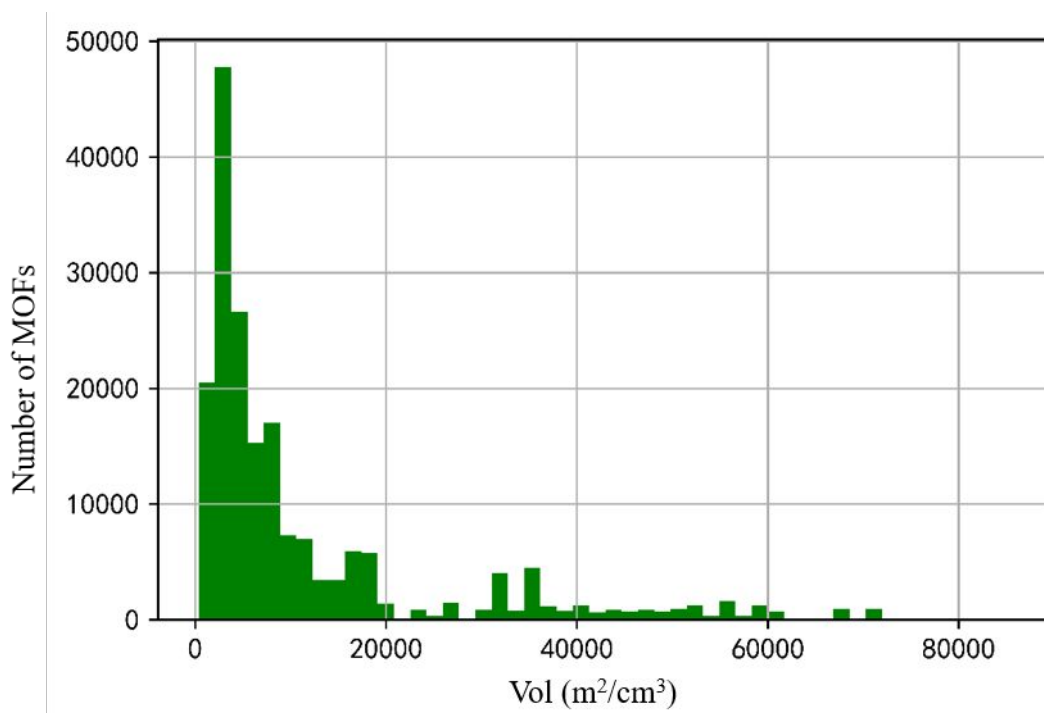

(a)

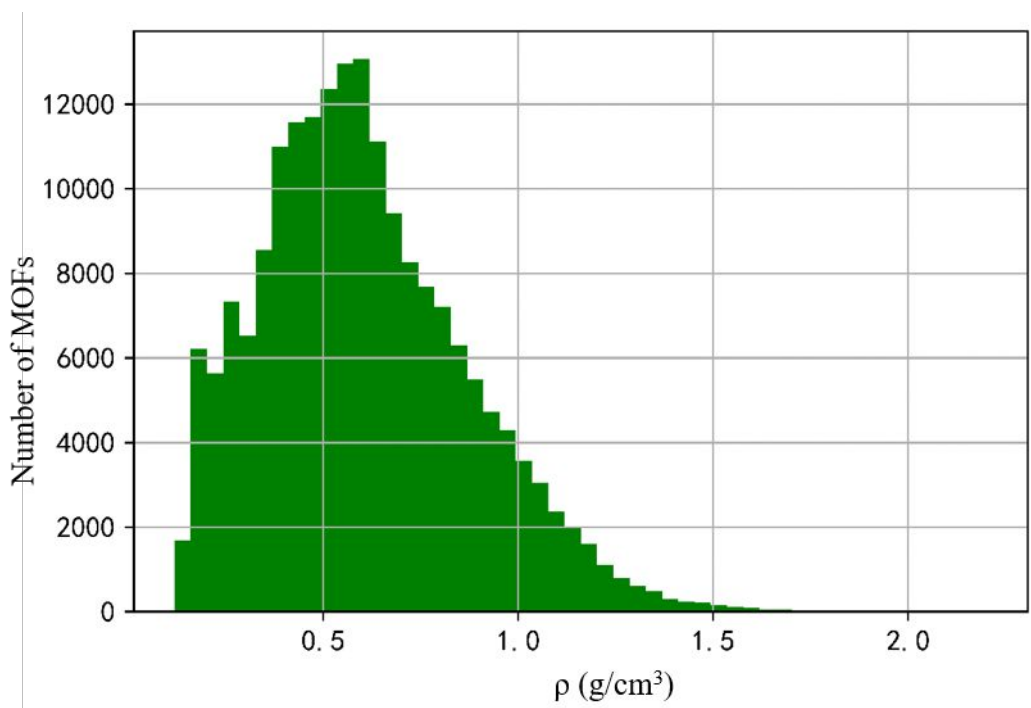

(b)

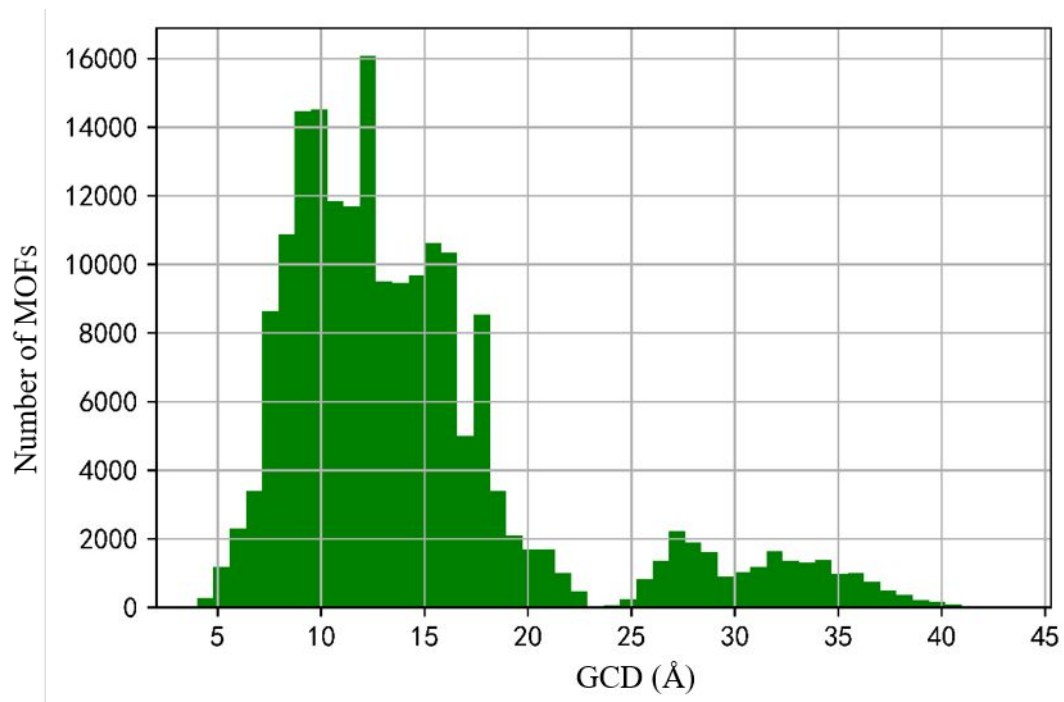

(c)

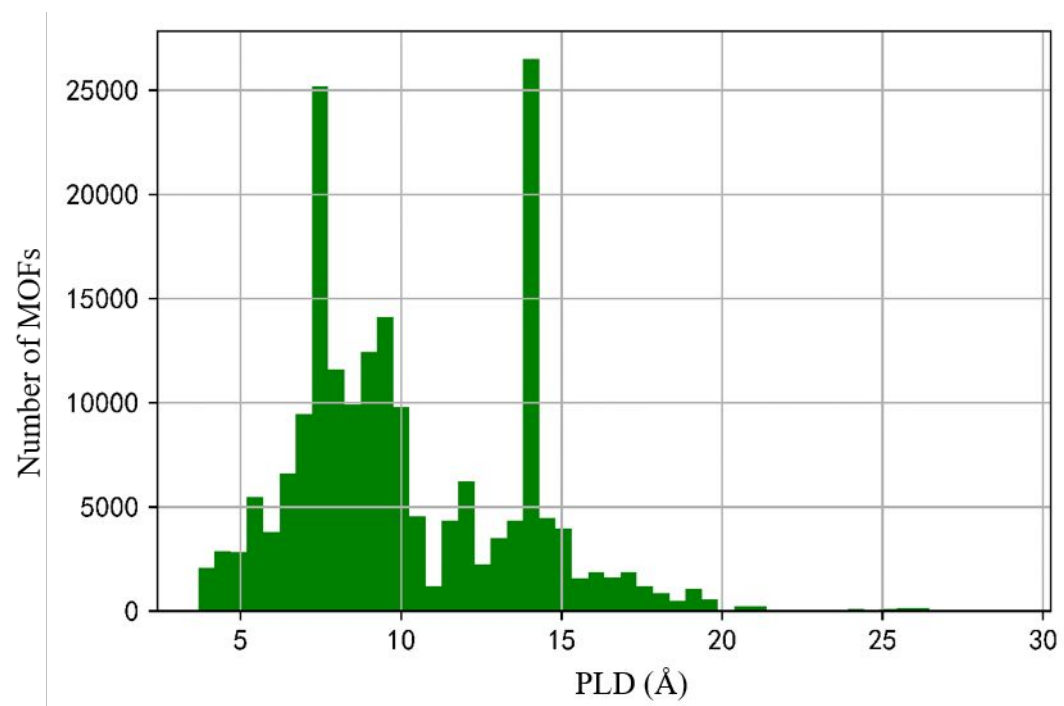

(d)



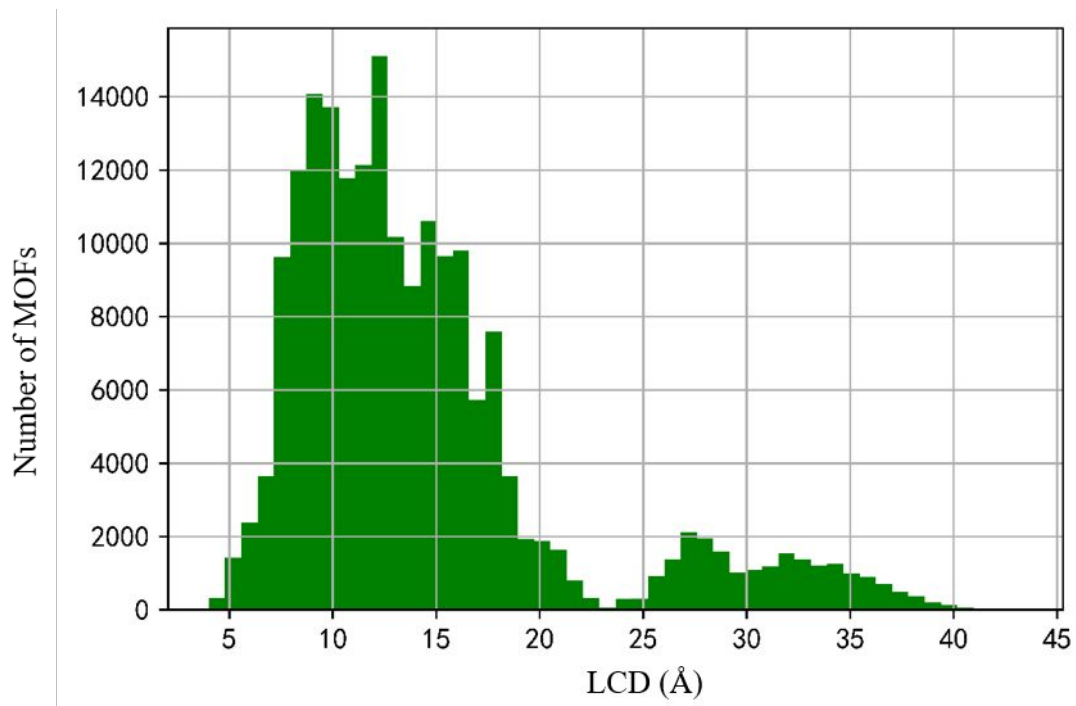

(e)

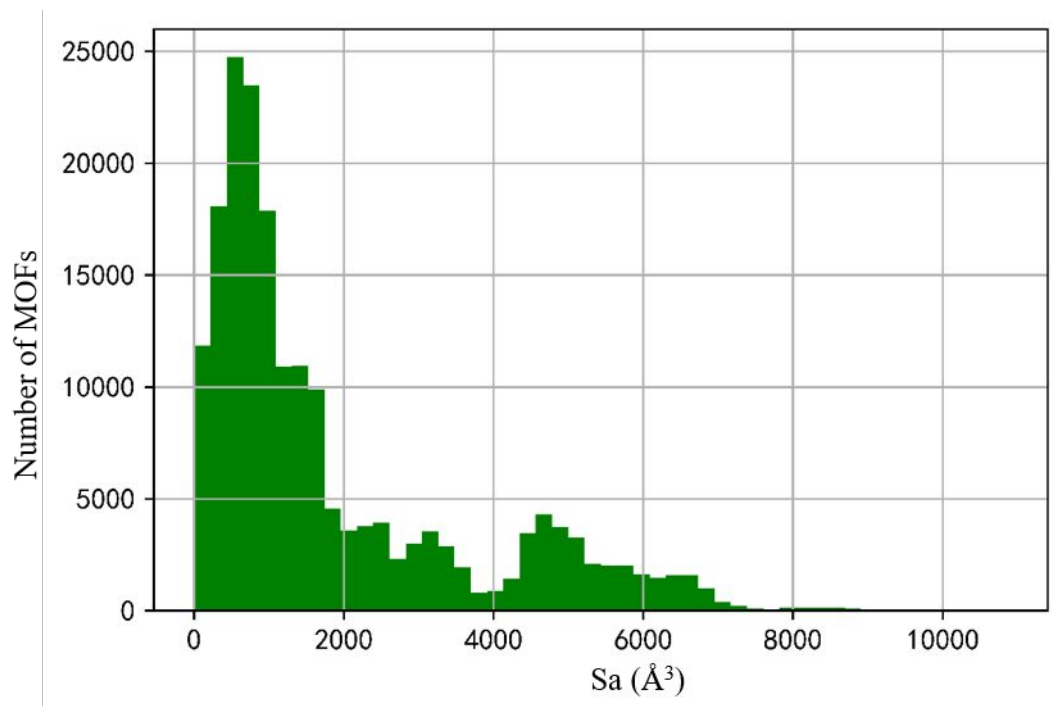

(f)

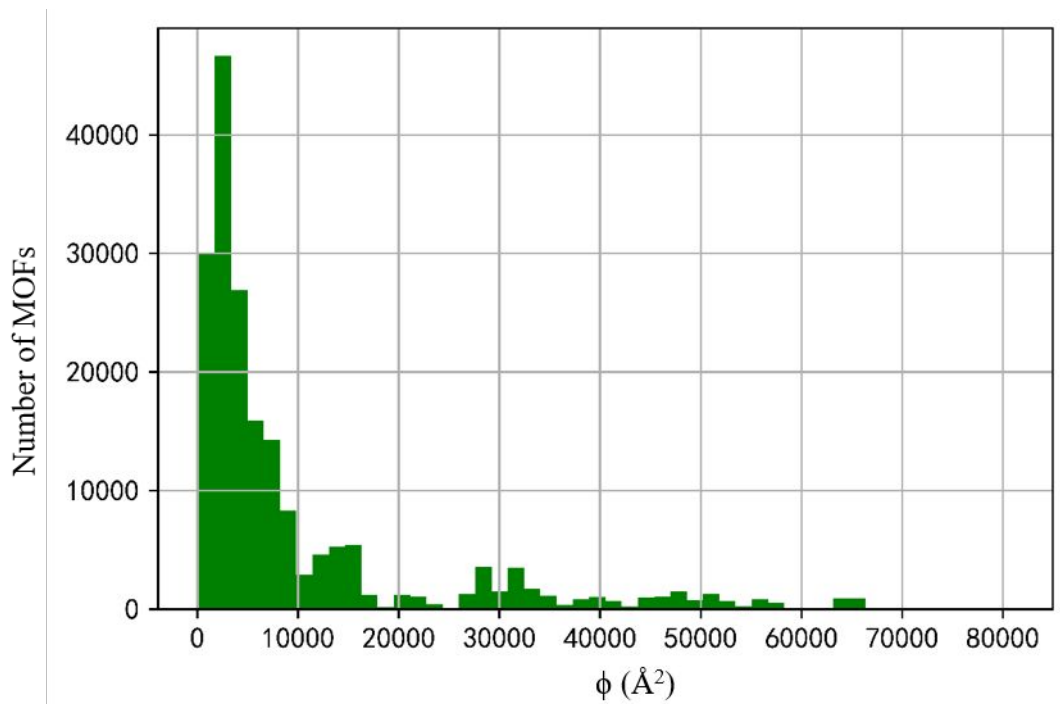

(g)

**Figure S1.** The plotted histogram of adsorption property distribution of G-MOFs upon: a) pore volume (Vol); b) density ( $\rho$ ); c) global cavity diameter (GCD); d) pore limiting diameter (PLD); e) large cavity diameter (LCD); f) specific surface area (Sa) and g) porosity ( $\phi$ ).

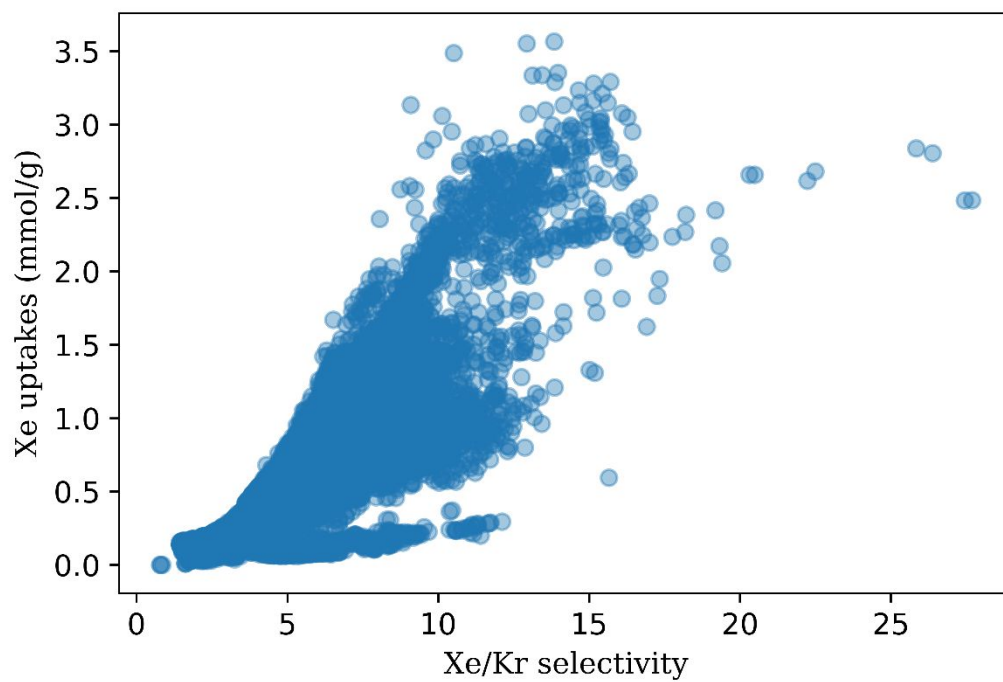

**Figure S2.** The parity plots between Xe/Kr selectivity and Xe uptake based on the G-MOFs database.

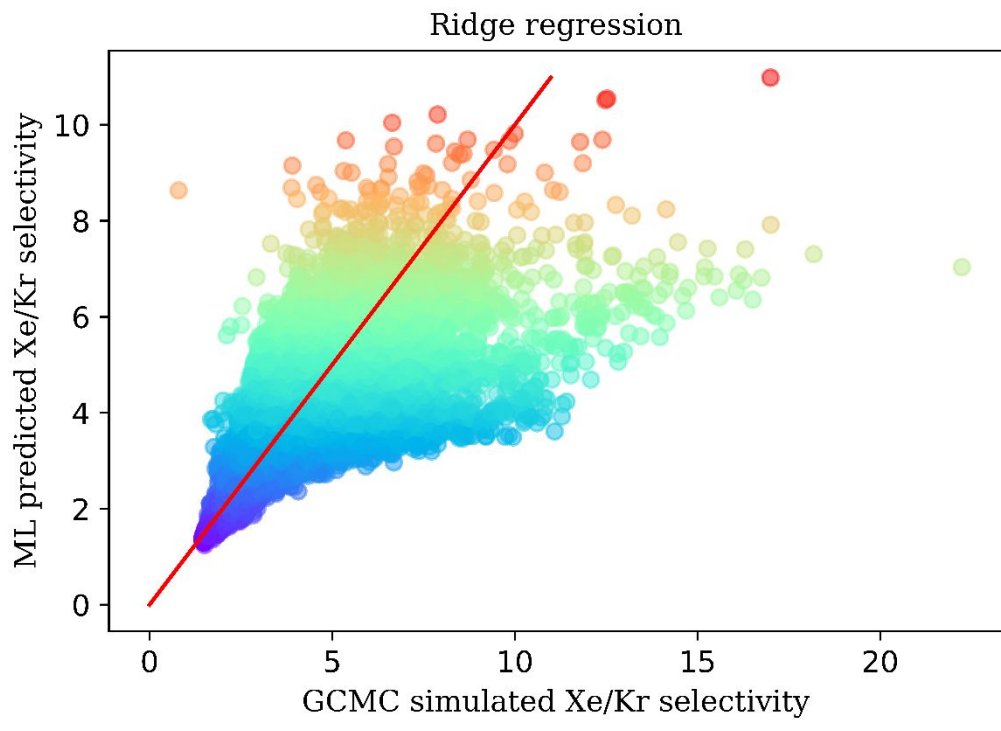

**(a-1)**

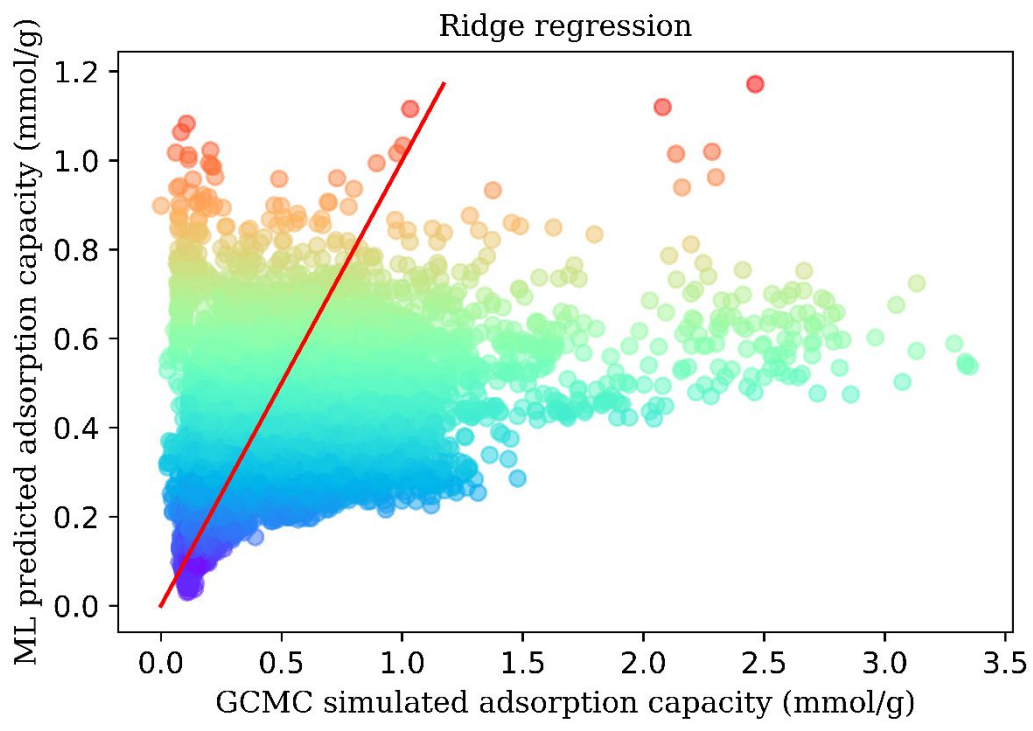

**(a-2)**

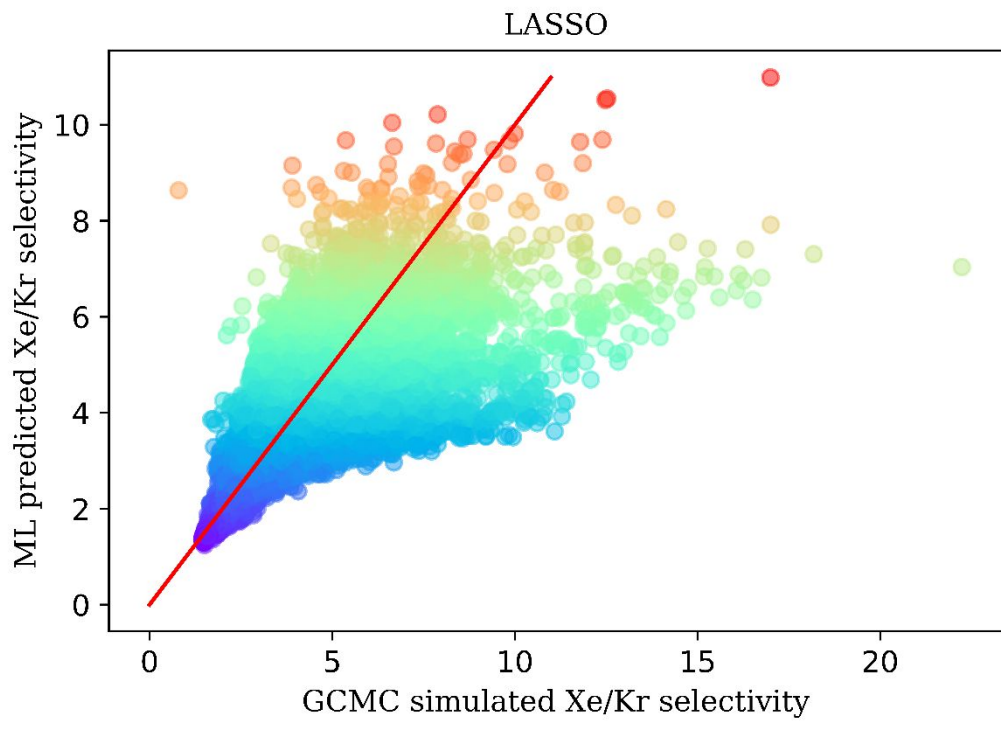

**(b-1)**

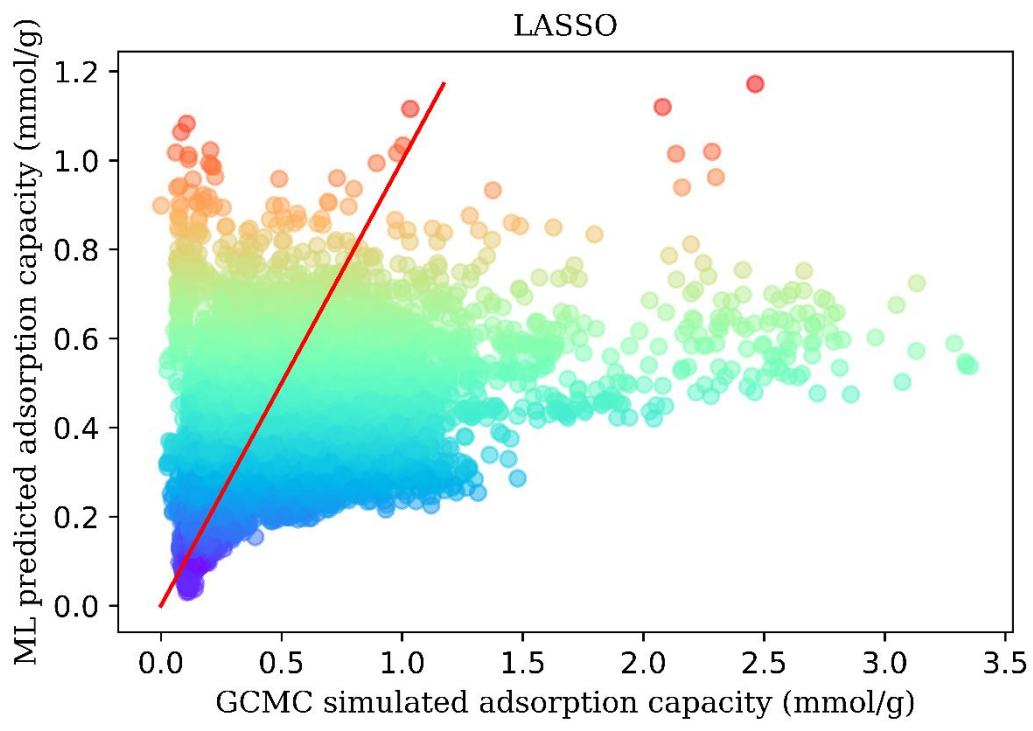

**(b-2)**

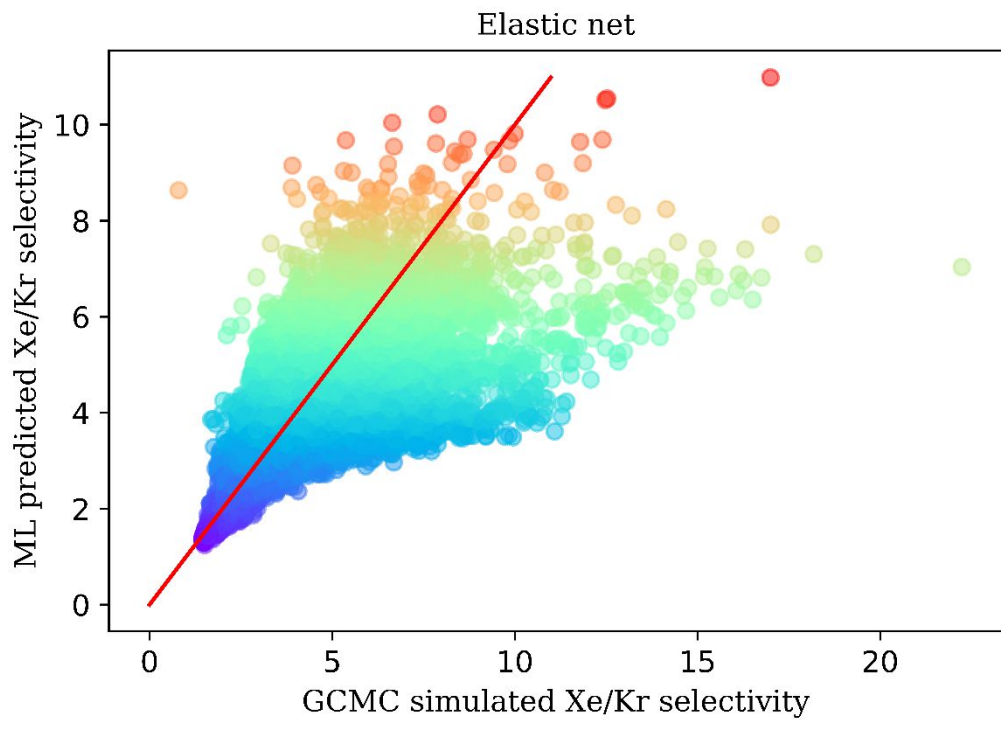

(c-1)

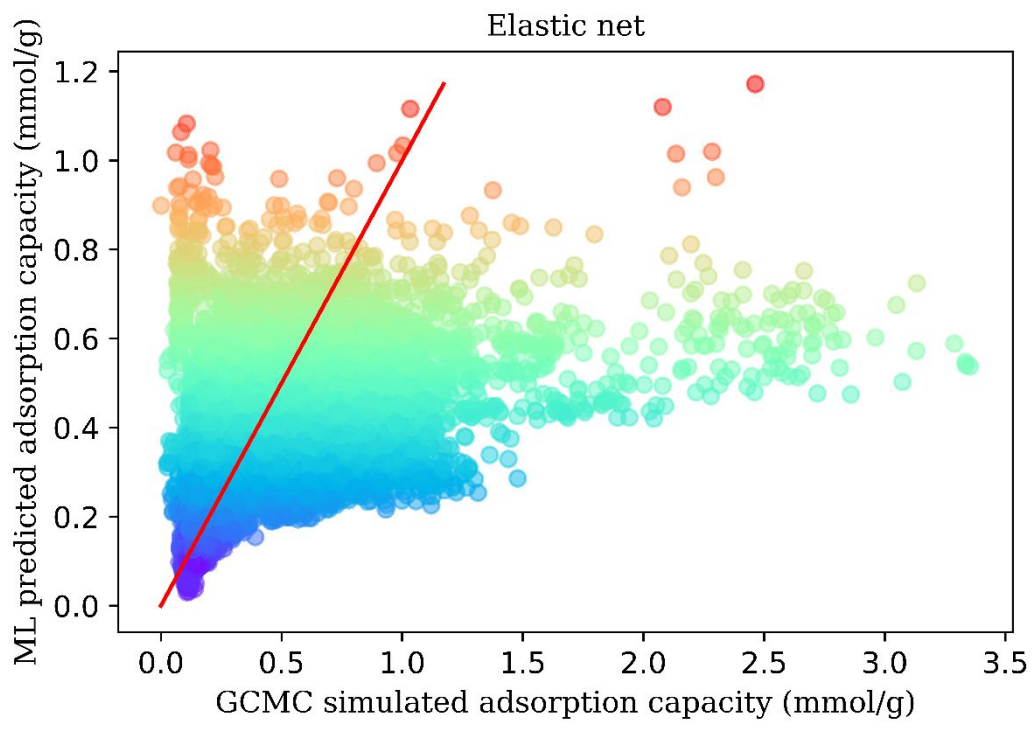

(c-2)

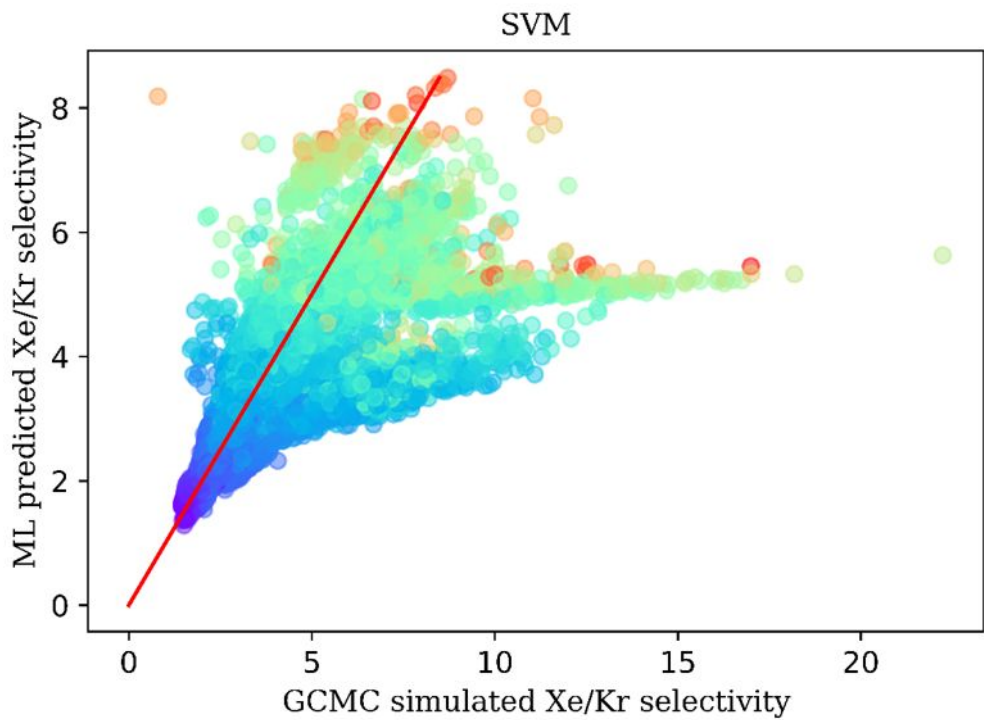

**(d-1)**

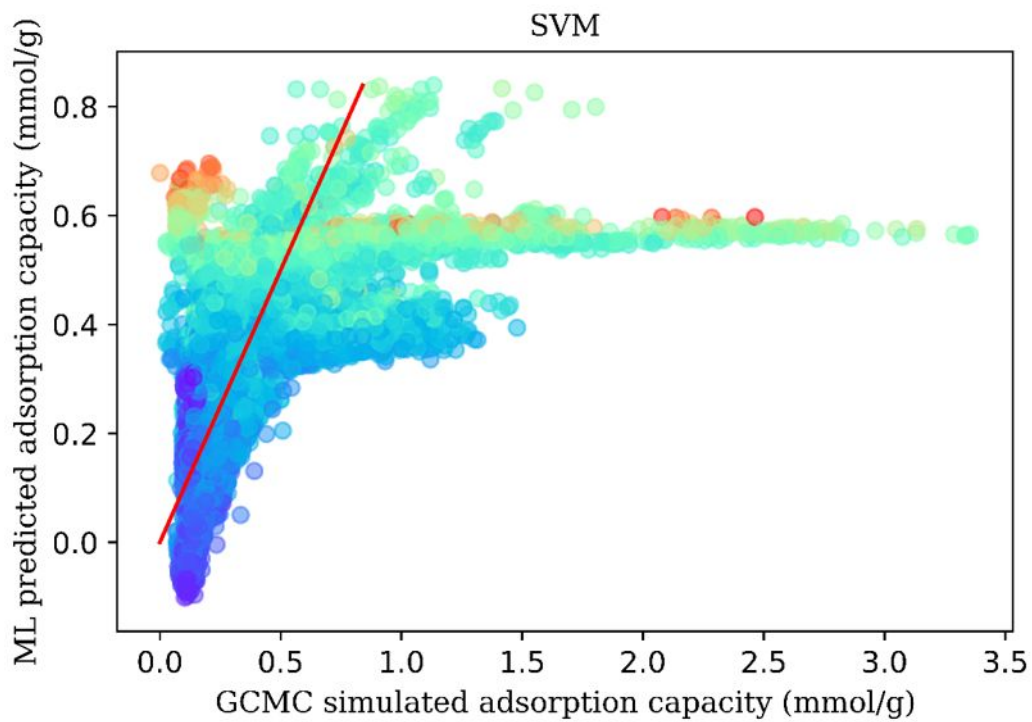

**(d-2)**

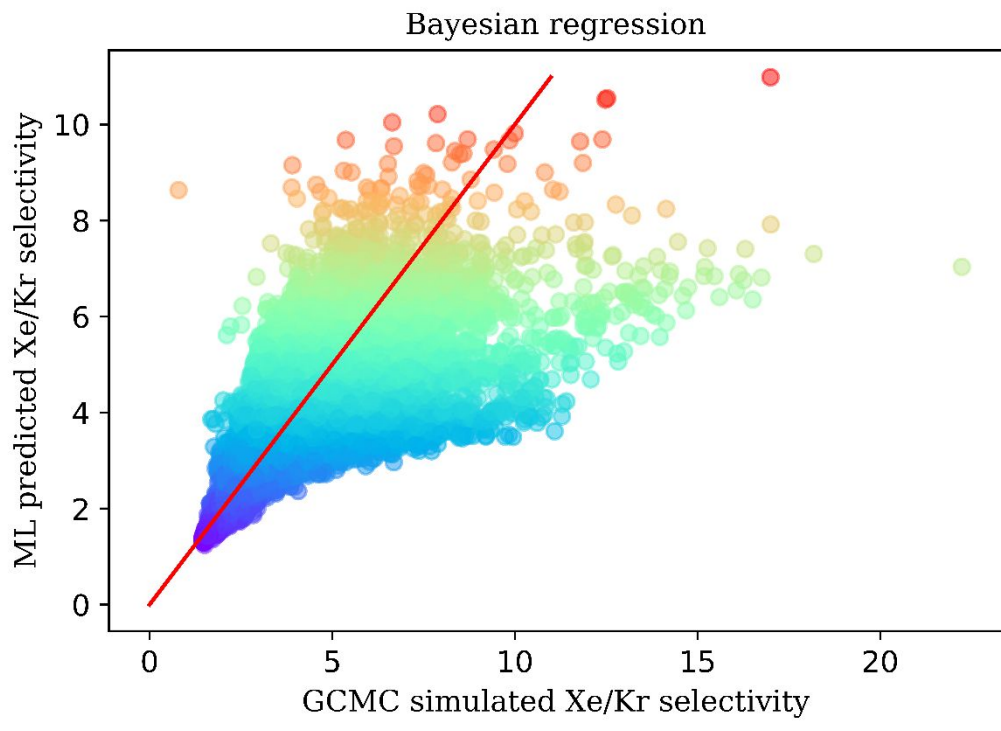

(e-1)

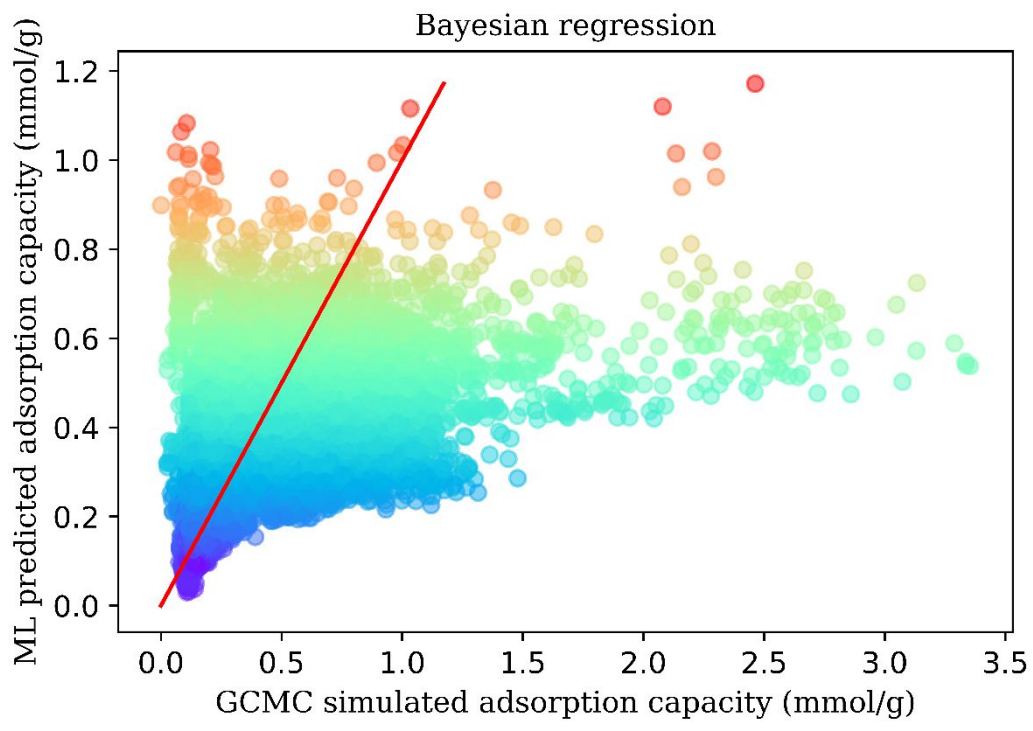

(e-2)



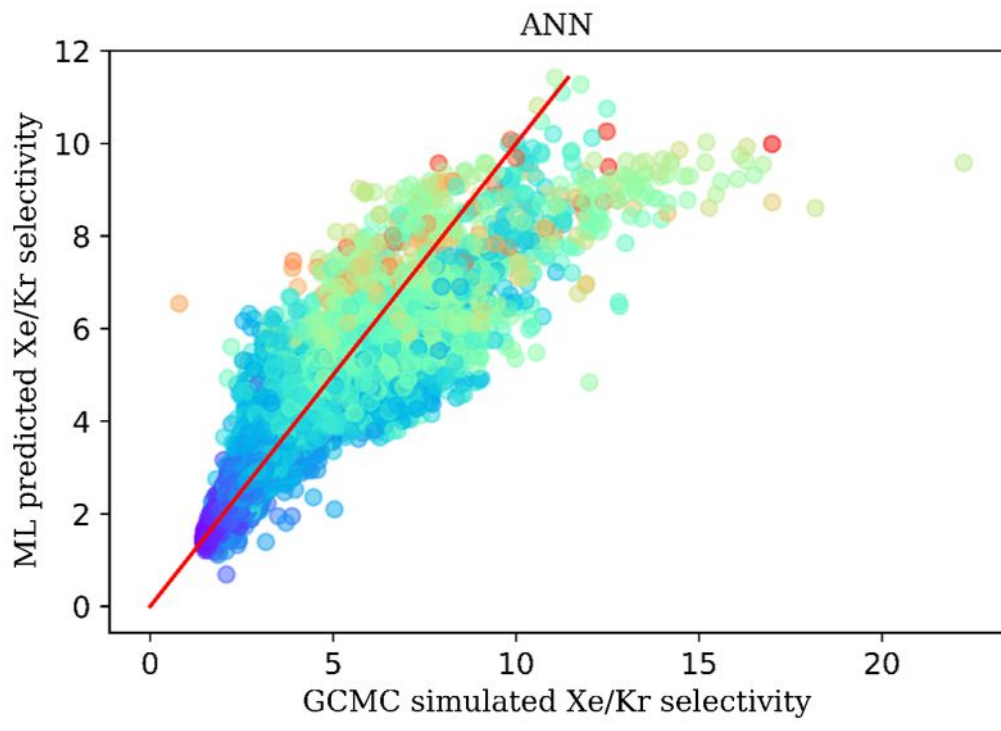

(f-1)

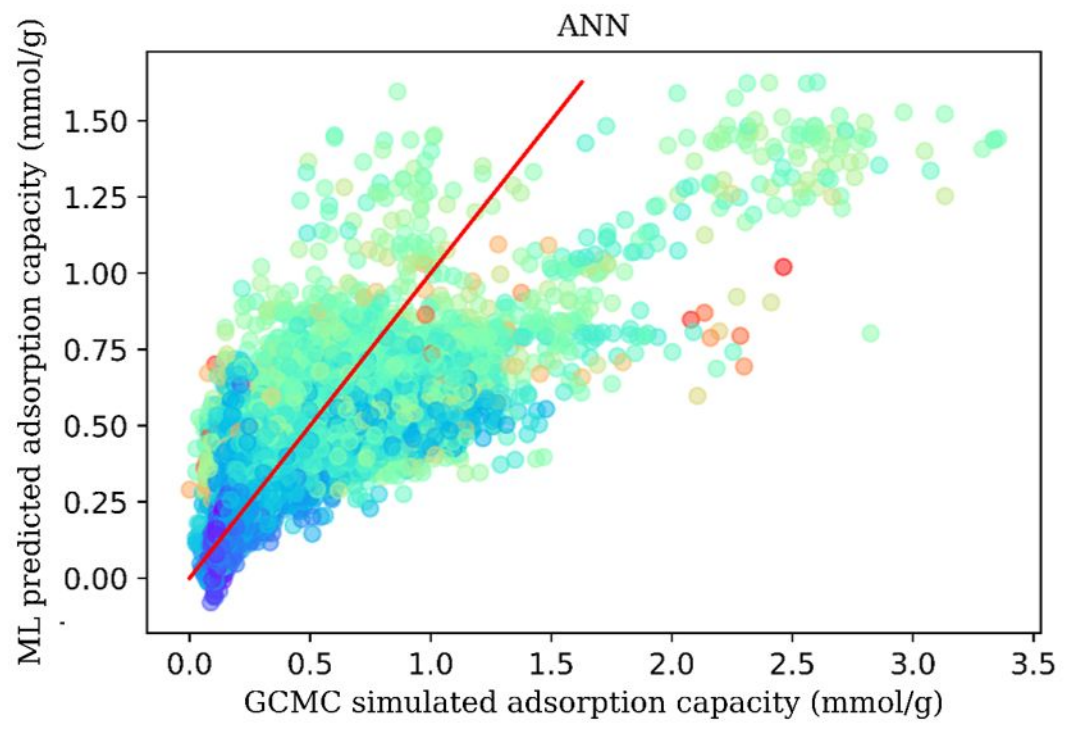

(f-2)

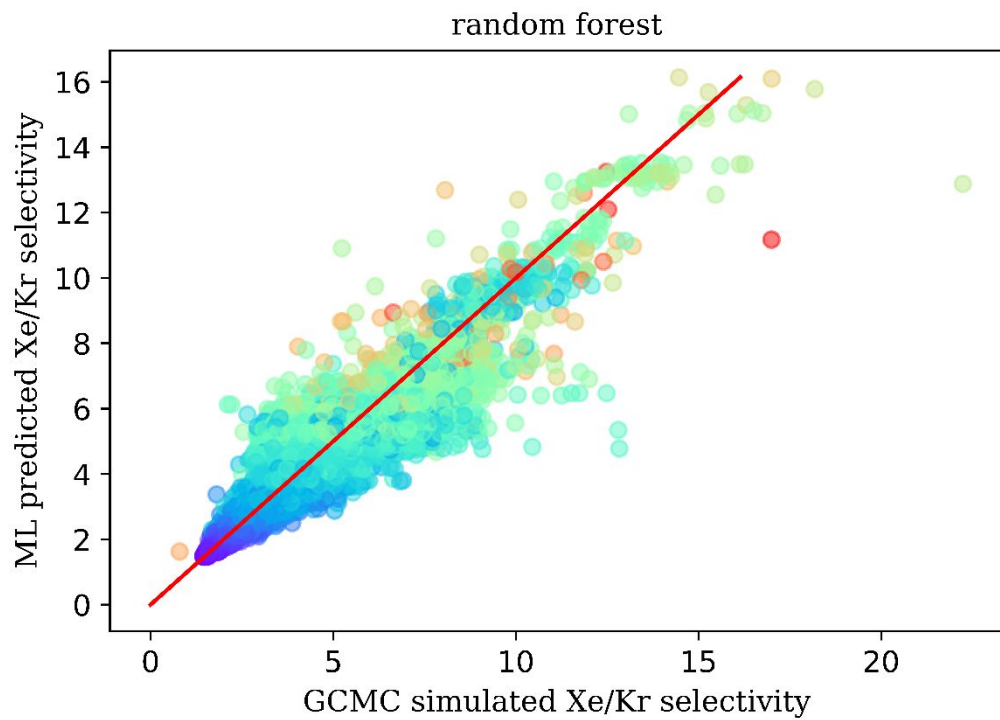

**(g-1)**

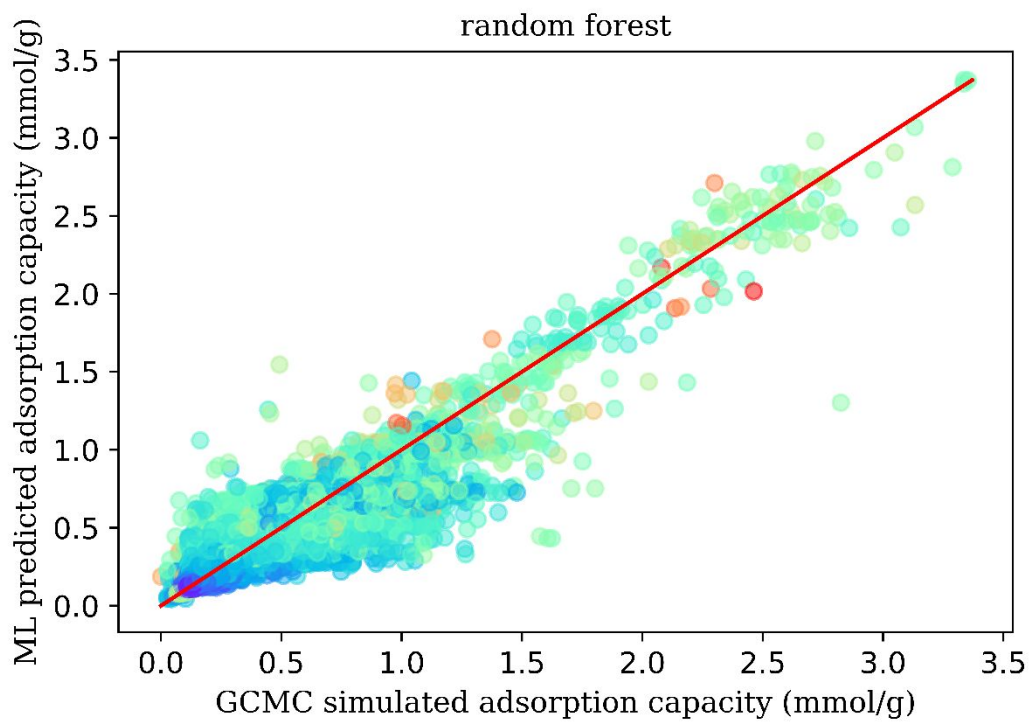

**(g-2)**

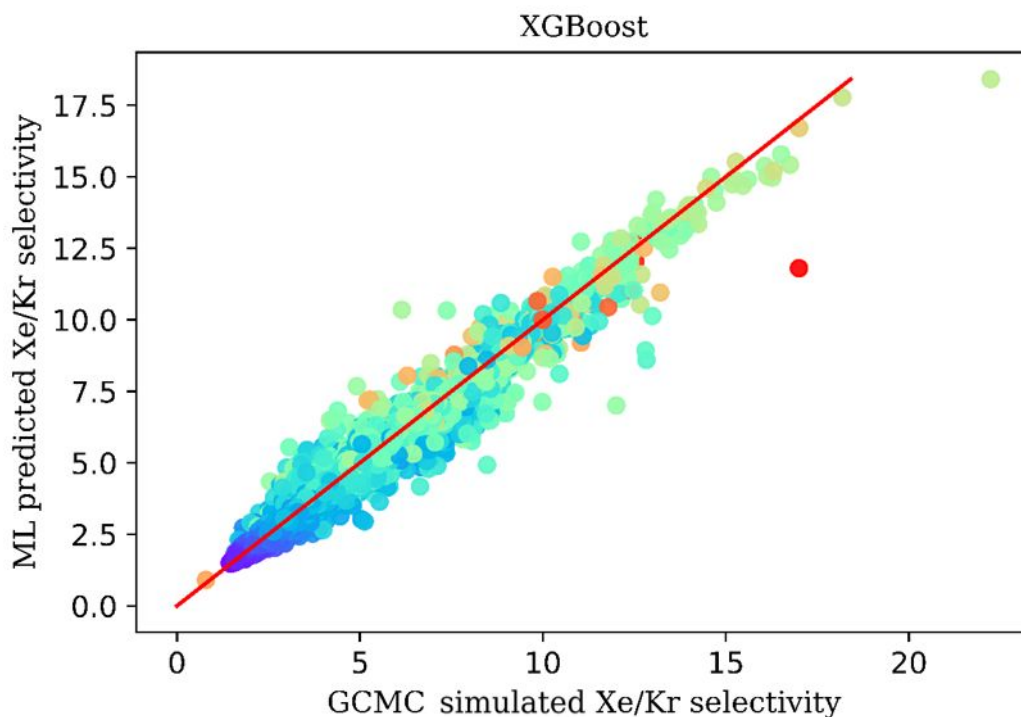

(h-1)

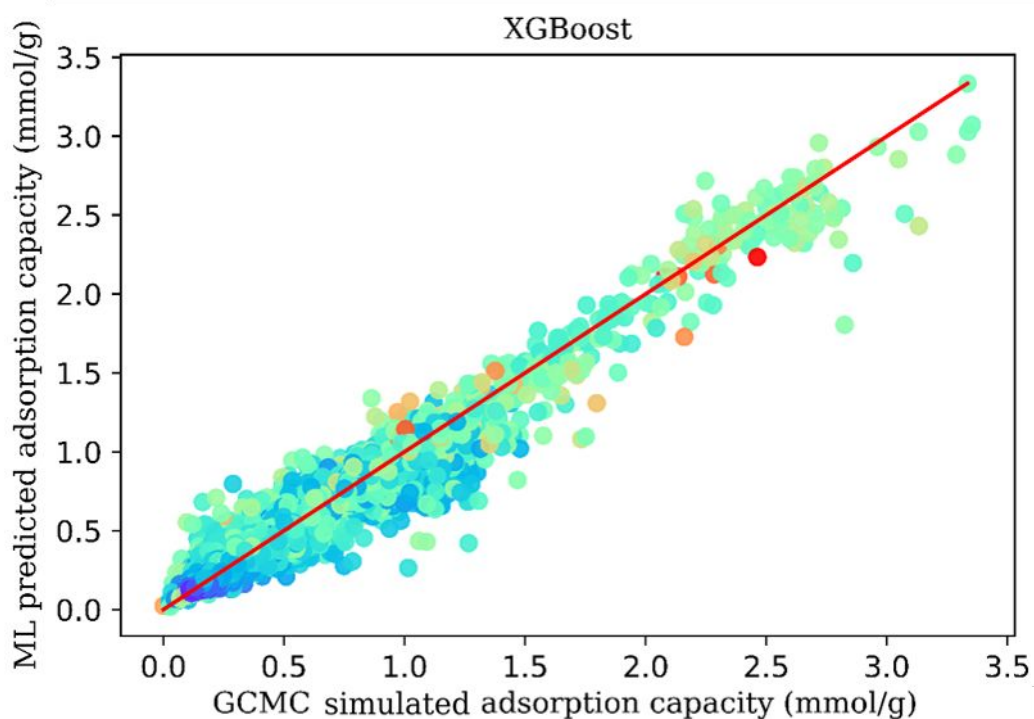

(h-2)

**Figure S3.** The parity plots of Xe/Kr selectivities and Xe uptakes between GCMC simulations and different ML models prediction on the testing set based on eight

different machine learning models, including: a-1) the predicted Xe/Kr selectivities under ridge regression model. Note that red represents high density, blue represents low density; a-2) the predicted Xe uptakes under ridge regression model; b-1) the predicted Xe/Kr selectivities under LASSO model; b-2) the predicted Xe uptakes under LASSO model; c-1) the predicted of Xe/Kr selectivities under Elastic Net model; c-2) the predicted Xe uptakes under Elastic Net model; d-1) the predicted Xe/Kr selectivities under Support Vector Machine model; d-2) the prediction of Xe uptakes under Support Vector Machine model; e-1) the predicted of Xe/Kr selectivities under Bayesian Regression model; e-2) the predicted of Xe uptakes under Bayesian Regression model; f-1) the predicted of Xe/Kr selectivities under ANN model; f-2) the predicted Xe uptakes under ANN model; g-1) the predicted Xe/Kr selectivity under RF model; g-2) the predicted Xe uptakes under RF model; h-1) the predicted Xe/Kr selectivities under XGBoost model and h-2) the predicted Xe uptakes under XGBoost model. Note that each dot represents one MOF structure from the G-MOFs database. The red line represents that the GCMC calculations is same as the ML prediction results. The point closer to the red line, the more accurate adsorption property that the model predicts.

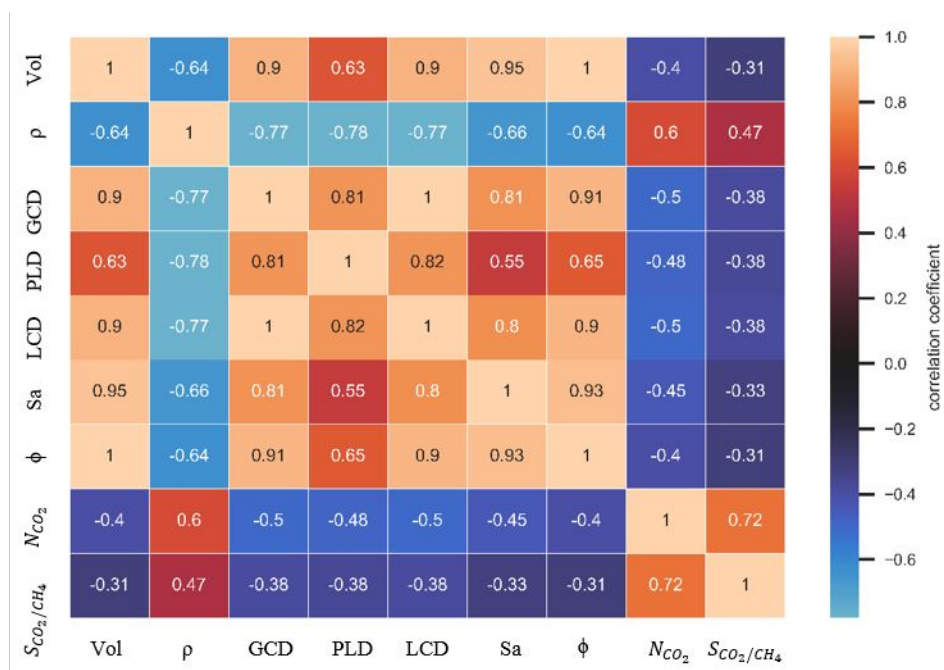

**Figure S4.** The plotted correlation diagram between material features and adsorption properties of CO<sub>2</sub>/CH<sub>4</sub> based on G-MOFs database. Note that the color bars represent the size of the Pearson correlation coefficients.

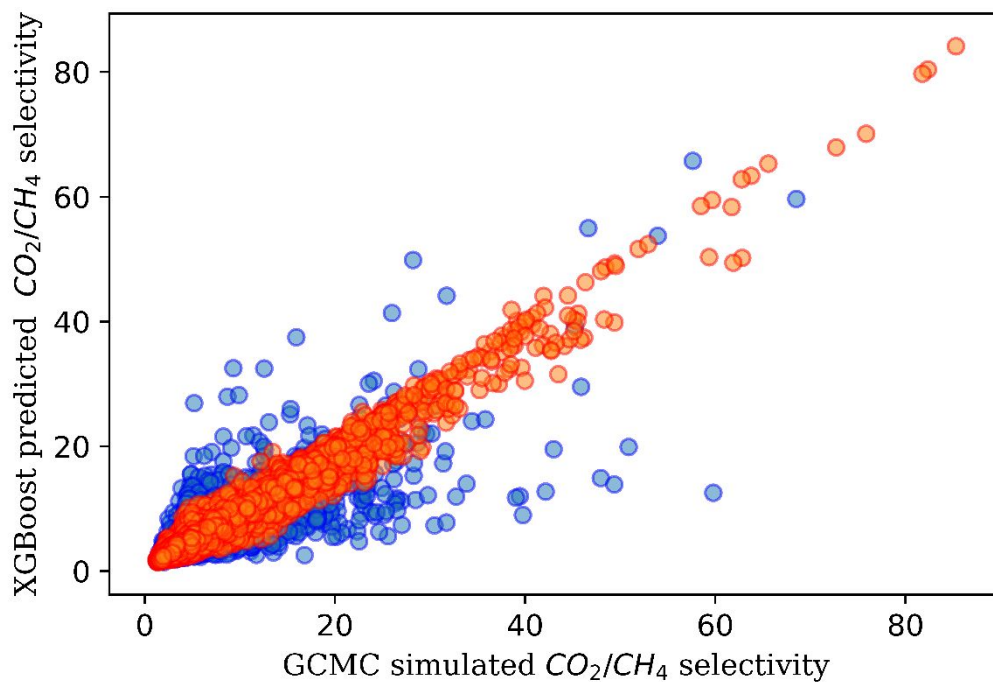

(a)

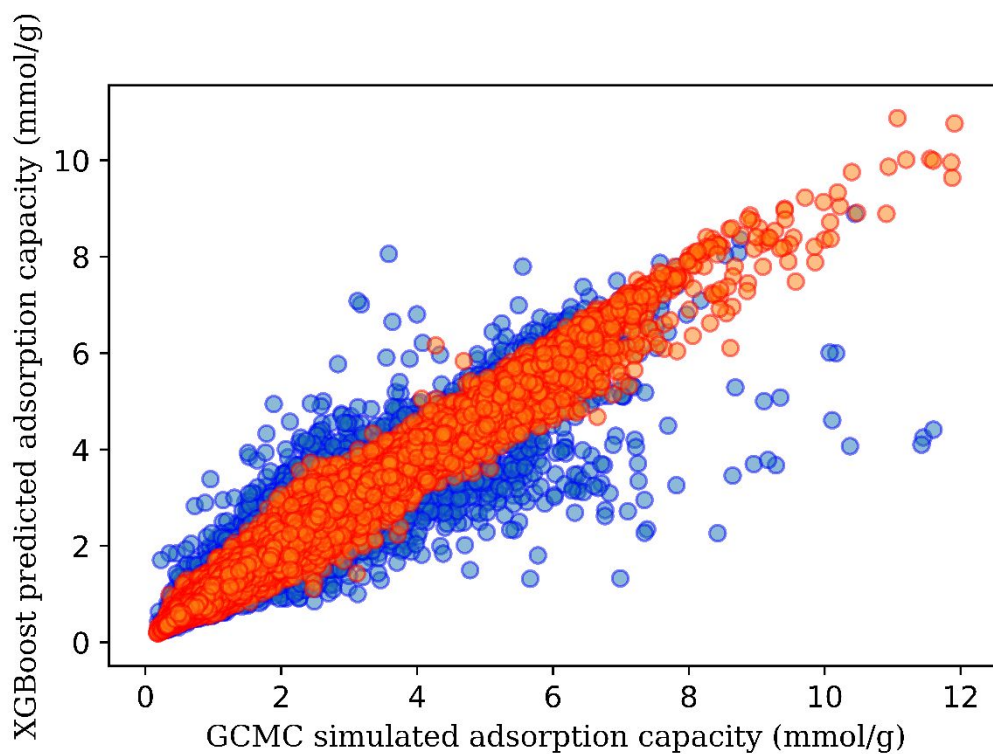

(b)

**Figure S5.** The parity plots for training and testing sets data from the G-MOFs database using XGBoost model for the a)  $\text{CO}_2/\text{CH}_4$  selectivity and b)  $\text{CO}_2$  uptake at 1 bar and

298 K. Each dot represents one MOF structure from the G-MOFs database. The red and blue dots represent the training set and testing set data, respectively.
